# Supplementary material for: The assessment of psychological well-being in systemic sclerosis: a clinimetric validation
Source: Springer Nature journal article supplement (doi:10.1186/s40359-025-02820-y), 2025-05-12

**Figure S3.** Person-item threshold distribution displaying the relative logit distribution of the PBW-6 item thresholds and the population sample


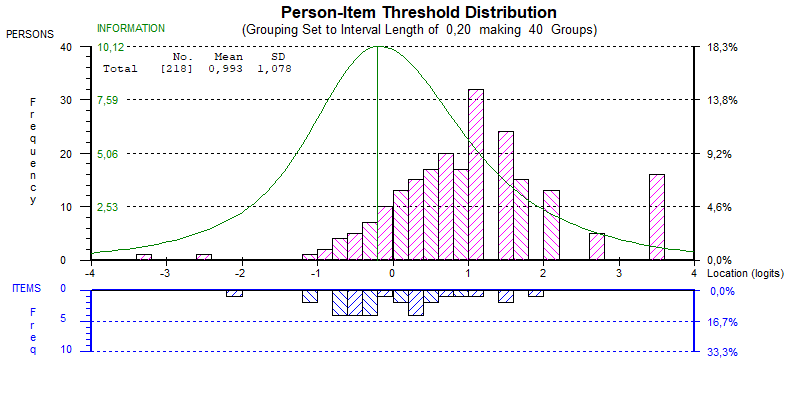

Supplement: MOESM3 [file 40359_2025_2820_MOESM3_ESM.docx]
