# Supplementary figures and images for: The assessment of psychological well-being in systemic sclerosis: a clinimetric validation
Source: Springer Nature journal article supplement (doi:10.1186/s40359-025-02820-y), 2025-05-12

**Figure S1.** Item PWB-5 demonstrating non-uniform differential item functioning regarding sex


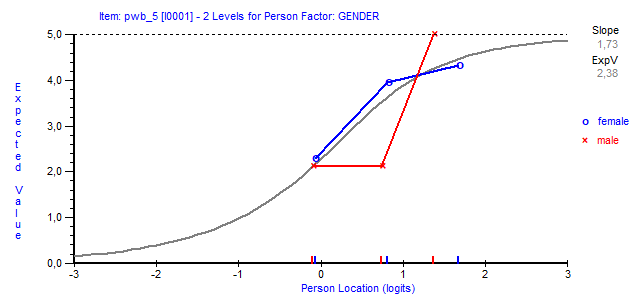

Supplement: MOESM1 [file 40359_2025_2820_MOESM1_ESM.docx]
